# Supplementary material for: Particle Swarm Optimized Hybrid Kernel-Based Multiclass Support Vector Machine for Microarray Cancer Data Analysis
Source: Hindawi journal article supplement (doi:10.1155/2019/4085725), 2019-12-16
Supplement: f1 [file 4085725.f1.pdf]

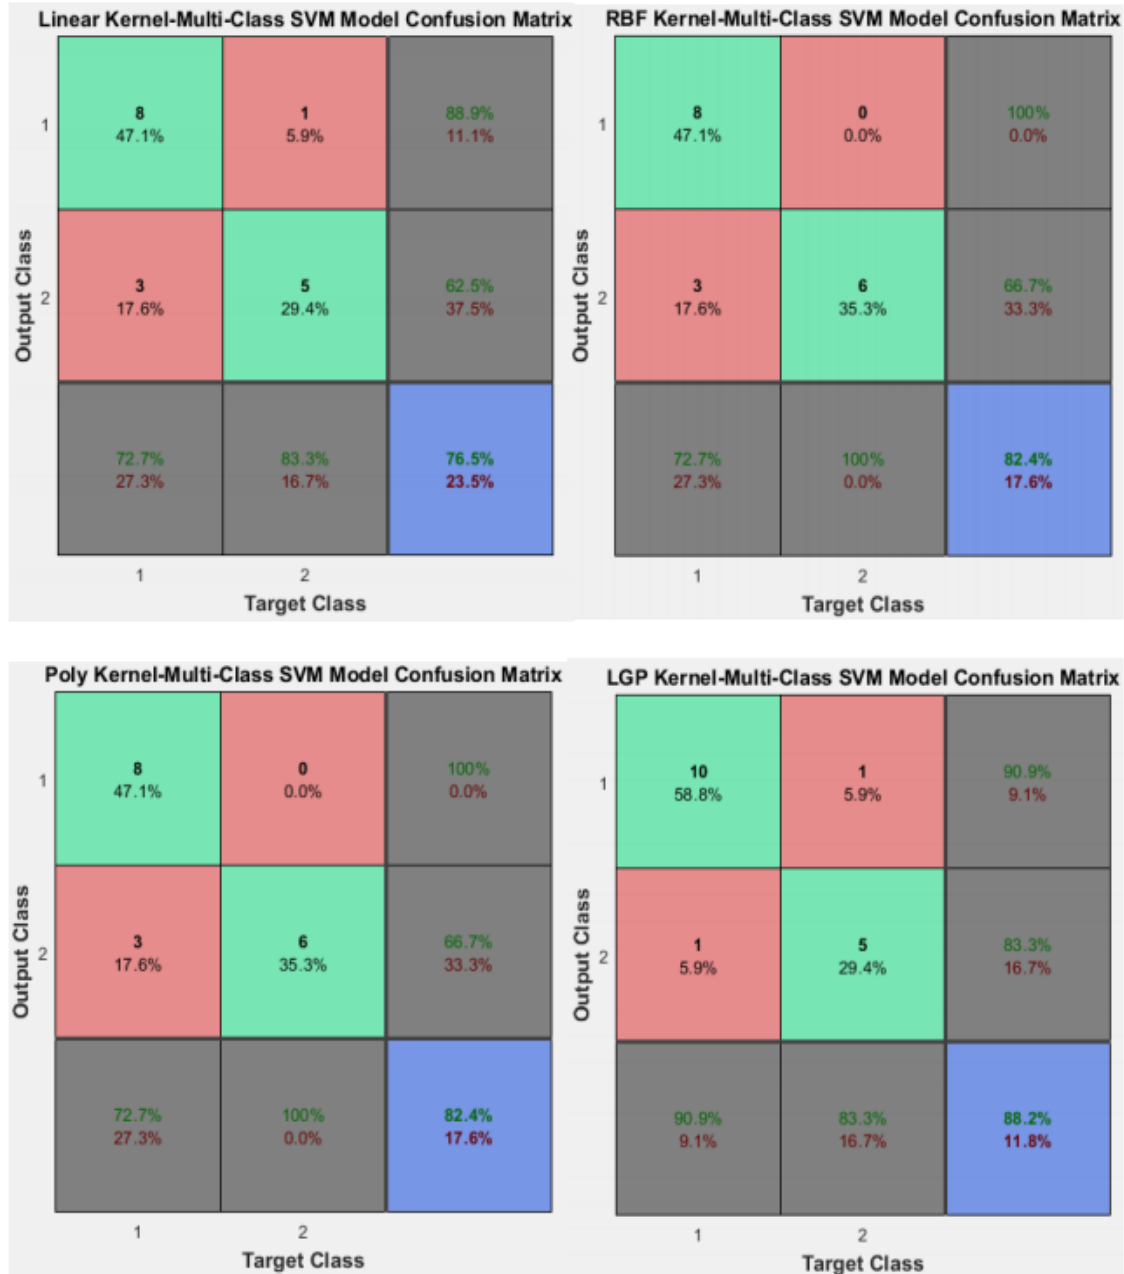

Figure 1: PSO-PCA-L-MCSVM, PSO-PCA-RBF-MCSVM, PSO-PCA-P-MCSVM and PSO-PCA-LGP-MCSVM confusion matrices for the Colon Cancer test samples

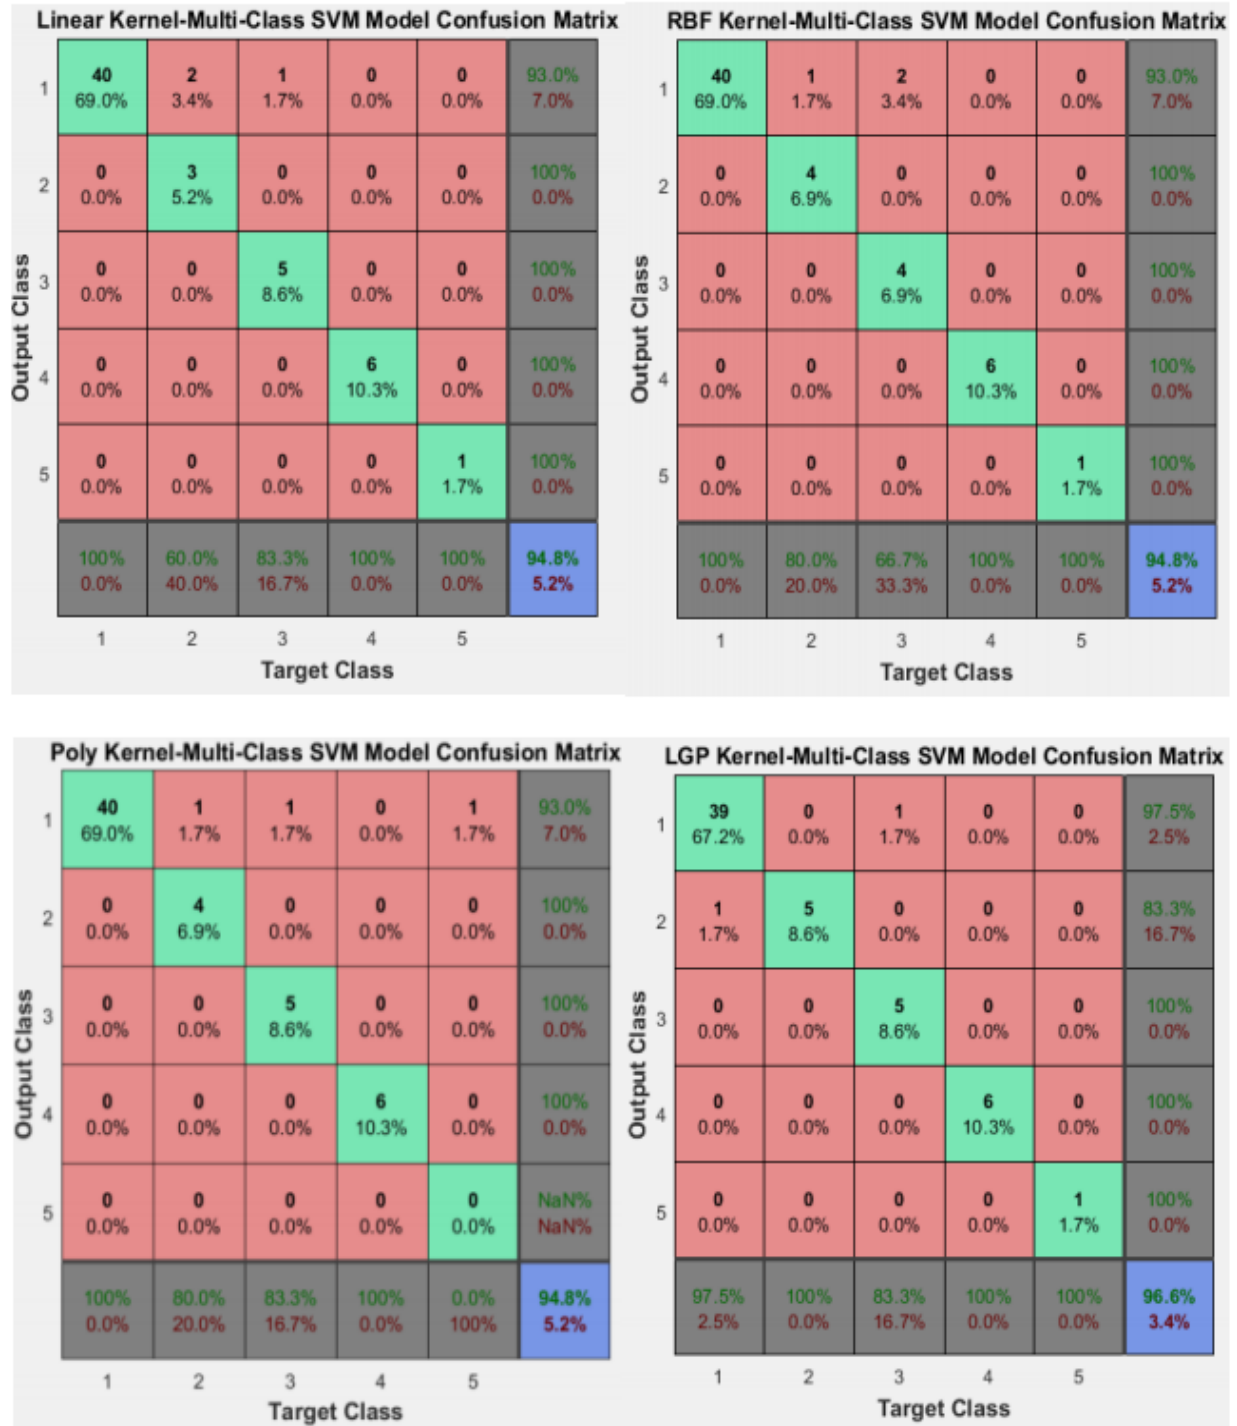

Figure 2: PSO-PCA-L-MCSVM, PSO-PCA-RBF-MCSVM, PSO-PCA-P-MCSVM and PSO-PCA-LGP-MCSVM confusion matrices for the LUNG Cancer test samples

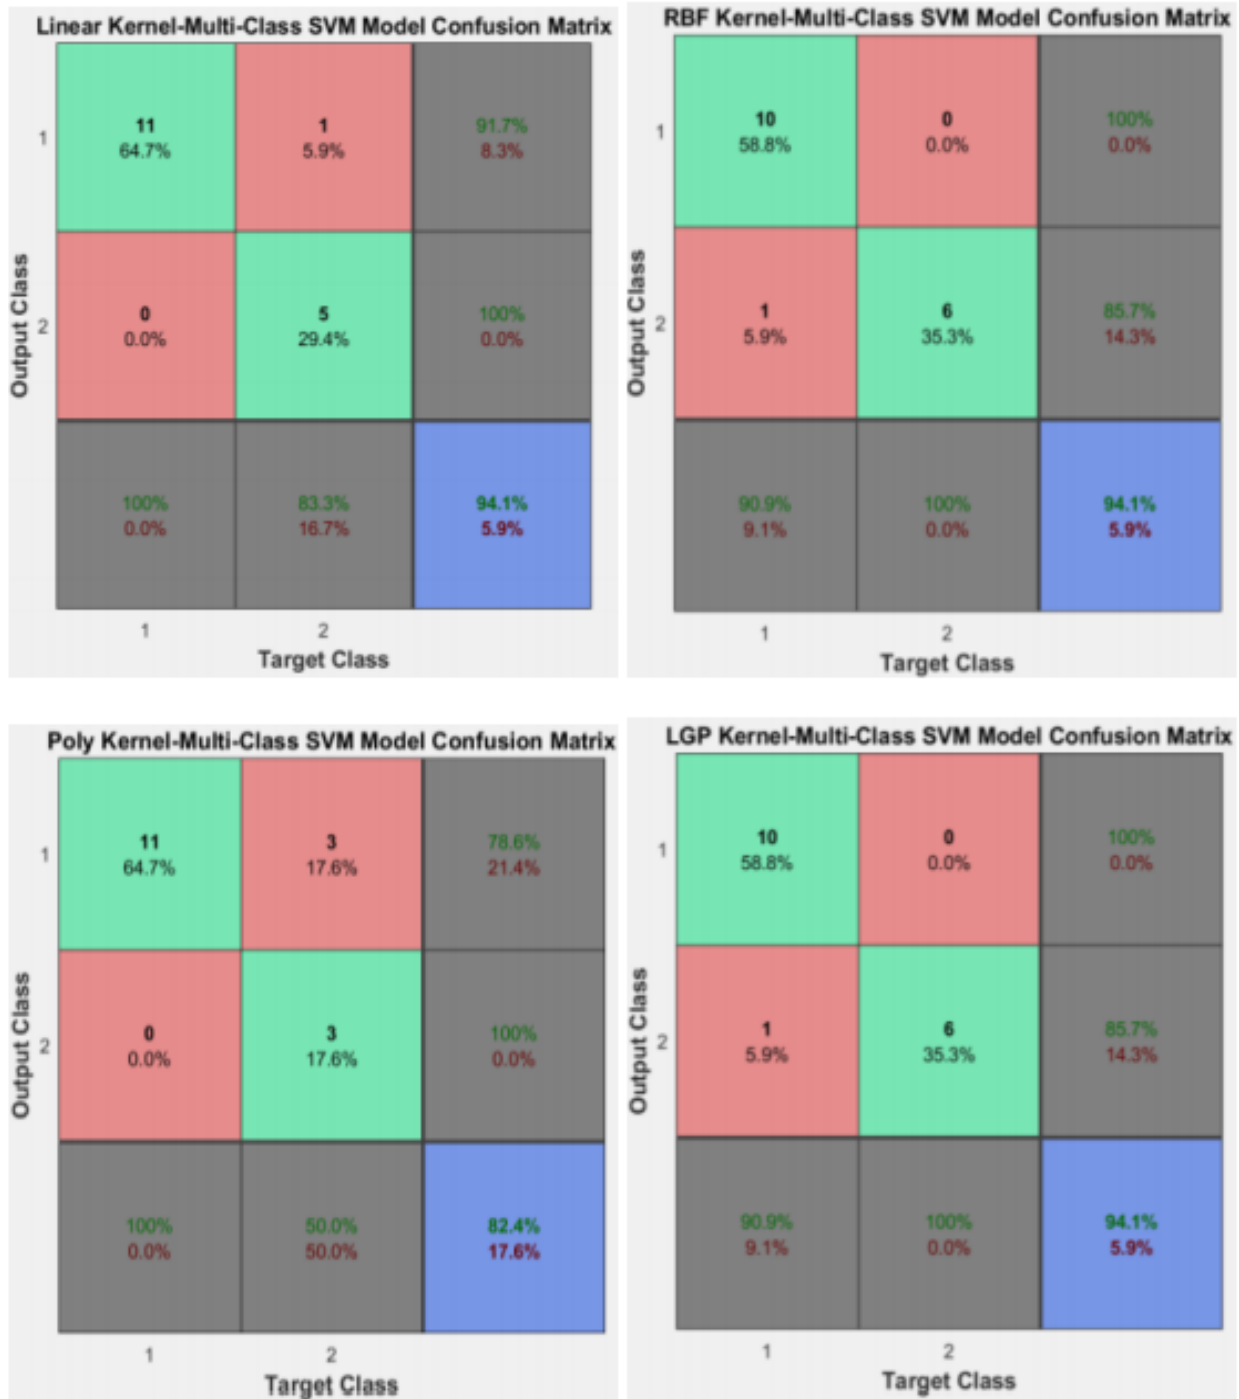

Figure 3: PSO-PCA-L-MCSVM, PSO-PCA-RBF-MCSVM, PSO-PCA-P-MCSVM and PSO-PCA-LGP-MCSVM confusion matrices for the AMLALL test samples

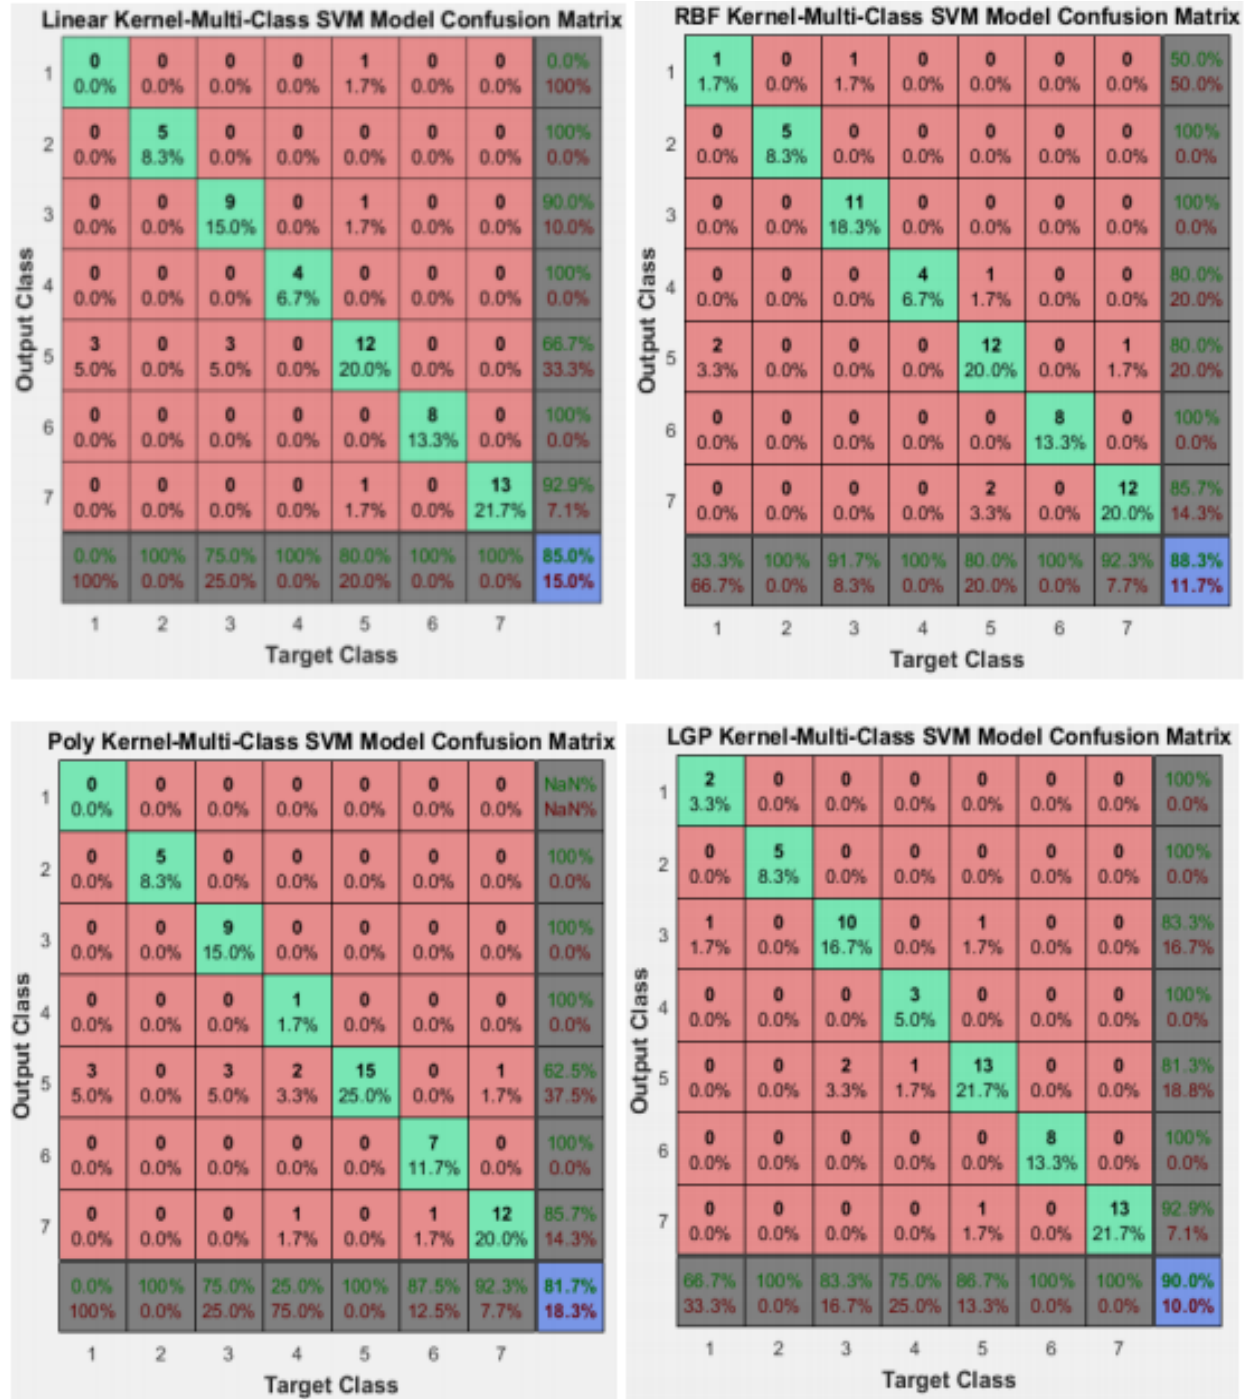

Figure 4: PSO-PCA-L-MCSVM, PSO-PCA-RBF-MCSVM, PSO-PCA-P-MCSVM and PSO-PCA-LGP-MCSVM confusion matrices for the STJUDE test samples
